# Supplementary material for: Habitat Specificity Modulates the Response of Small Mammals to Habitat Fragmentation, Loss, and Quality in a Neotropical Savanna
Source: Frontiers journal article supplement (doi:10.3389/fevo.2021.751315), 2021-12-23
Supplement: Table_1.xlsx [file Table_1.xlsx]

## Sheet: Table 1
Table 1. Small mammal abundance matrix, total abundance per species registered, abundance and estimated richness (Chao 1) for habitat generalists and forest specialists, Shannon diversity Index (exp(H´)), and Functional diversity Index (Rao´s Q) estimated for semideciduous forest patches (sampling sites) distributed in the landscapes representing a gradient of fragmentation and habitat loss in th…
	Proportion of habitat amount in the landscape / Sampling sites
	0.4												0.25												0.1
Species	1	2	3	4	5	6	7	8	9	10	11	12	13	14	15	16	17	18	19	20	21	22	23	24	25	26	27	28	29	30	31	32	33	34	35	36	Total
Calomys expulsus	0	0	0	2	0	0	2	6	0	1	0	0	1	1	1	0	2	0	1	4	1	0	4	0	1	5	8	7	6	0	1	6	3	0	0	1	64
Calomys tener	0	0	0	0	0	0	0	0	0	0	0	0	0	0	0	0	0	0	0	1	1	0	1	0	2	1	2	0	4	0	0	0	2	0	0	0	14
Cryptonanus agricolai	0	0	0	3	0	0	0	0	1	0	0	0	0	8	0	1	1	0	0	0	1	1	0	0	1	0	0	0	0	1	0	1	1	2	0	2	24
Didelphis albiventris	0	14	3	1	1	4	5	5	5	3	1	1	13	1	0	2	1	12	13	15	3	5	1	5	0	1	0	0	0	6	1	2	3	3	3	1	134
Gracilinanus agilis	2	14	61	19	3	12	21	35	6	8	1	7	33	43	12	34	45	1	63	52	20	10	21	18	14	17	25	41	24	49	12	29	26	38	18	6	840
Hylaeamys megacephalus	0	3	1	0	0	2	0	0	0	0	0	0	0	0	1	4	1	0	0	0	3	0	0	0	0	0	0	0	0	0	0	0	0	0	0	0	15
Marmosa demerarae	0	0	0	0	2	0	0	0	0	0	2	0	0	0	0	0	0	0	0	0	0	0	0	0	0	1	0	0	0	0	0	0	0	0	0	3	8
Marmosa cf. murina	0	5	0	0	0	0	0	0	0	0	0	0	0	0	0	0	0	2	0	0	0	0	0	0	0	0	0	0	0	0	0	0	0	0	0	1	8
Oecomys catherinae	0	3	0	0	0	0	0	0	0	0	0	0	0	0	0	0	0	0	0	0	0	0	0	0	0	0	0	0	3	1	0	0	1	0	0	0	8
Oecomys cleberi	3	2	2	0	0	0	0	3	0	0	1	0	0	5	1	1	12	1	7	6	0	12	0	0	0	1	1	0	12	2	17	4	0	21	6	1	121
Oligoryzomys mattogrossae	0	0	0	3	2	0	0	0	0	0	0	0	0	0	0	1	0	0	0	0	0	4	0	0	0	0	0	0	0	0	0	0	0	0	0	0	10
Oligoryzomys cf. moojeni	0	0	0	0	0	0	0	0	0	0	0	0	1	1	0	0	3	0	0	0	0	0	0	0	0	0	0	0	0	0	0	0	0	0	0	0	5
Oligoryzomys nigripes	0	0	0	0	0	0	0	0	0	0	0	0	0	1	0	0	0	0	0	0	0	0	0	0	0	0	0	0	0	0	0	0	0	0	0	0	1
Rhipidomys macrurus	0	0	20	0	0	0	3	0	0	0	0	0	6	24	0	0	1	0	2	14	0	0	0	0	0	0	0	0	0	0	0	0	0	0	0	0	70
Rattus rattus	0	0	0	0	0	0	0	0	0	0	0	0	0	0	0	0	0	0	0	0	0	0	0	0	0	1	0	0	0	0	0	0	0	0	0	0	1
Total abundance	304												567												452
	5	41	87	28	8	18	31	49	12	12	5	8	54	84	15	43	66	16	86	92	29	32	27	23	18	27	36	48	49	59	31	42	36	64	27	15	1323
Response variables
Generalists abundance	2	28	64	25	4	16	28	46	12	12	2	8	47	54	13	37	49	13	77	72	26	16	27	23	18	25	35	48	34	56	14	38	35	43	21	10
Specialists abundance	3	13	23	3	4	2	3	3	0	0	3	0	7	30	2	6	17	3	9	20	3	16	0	0	0	2	1	0	15	3	17	4	1	21	6	5
Estimated richness (G)	1	2	2	4	2	2	3	3	3	3	3	2	3	8	2	3	4.5	2	3	4	8	3	5	2	4.5	8	3	2	3	3	4	4	5	3	2	4.5
Estimated richness (S)	1	4	3	1	2	1	1	1	0	0	2	0	2	3	3	4	5	2	2	2	1	2	0	0	0	3	1	0	2	2	1	1	1	1	1	4
Shannon Diversity	1.96013	4.5742	2.31887	2.85555	3.74675	2.33657	2.61417	2.46304	2.50535	2.27951	3.78929	1.45757	2.81696	3.68247	2.05469	2.25177	2.91964	2.27565	2.35615	3.55453	2.92699	4.01315	2.05957	1.68807	2.13989	3.36665	2.334	1.515	3.76914	1.8958	2.50525	2.69563	2.74242	2.52673	2.33657	5.36129
Functional Diversity	0.101971	0.1691	0.0929941	0.0943047	0.152196	0.130664	0.11632	0.110083	0.115662	0.114926	0.146467	0.0517869	0.131244	0.107226	0.0889507	0.089884	0.109392	0.112265	0.0998105	0.139898	0.120443	0.163495	0.0921755	0.0805543	0.0764256	0.125327	0.113728	0.0647422	0.146721	0.0627553	0.12189	0.109403	0.102199	0.110606	0.113309	0.10941
Predictors
Patch area (ha)	13.3036	26.8008	2.75101	153.088	139.945	235.561	6.27846	2.40805	54.8677	59.5759	1440.83	77.2368	34.2916	12.7202	91.1398	134.649	6.70344	23.7234	29.7272	6.44351	17.9594	149.104	120.627	205.916	140.81	40.0795	13.9422	50.3359	66.0885	10.3228	4.90493	126.9	16.4313	4.90541	279.923	759.664
Isolation (m)	58.42	47.72	59.39	111.7	58.71	53.63	100.65	146.7	58.49	117.71	70.3	104.97	76.99	44.14	116.68	75	83.44	50.04	59.41	64.82	58.56	70.79	87.45	86.67	140.22	114.02	108.31	76.13	158.38	68.19	76.68	89.74	106.68	136.22	86.15	92.95
PC1	-1.98247	0.13895	-1.44785	-2.10901	-2.849	0.24693	2.06164	1.44206	2.41869	-0.857346	-0.268353	-0.0504603	-0.353979	-0.130339	0.394671	-1.44274	1.24079	1.09734	-0.786633	0.373597	-2.0046	-1.67613	-0.822817	-1.19909	1.42692	-0.221888	1.66629	0.597461	0.193652	3.07493	1.09965	-0.627209	0.281857	0.718491	0.619937	-0.263935
PC2	-1.21046	0.0116577	-0.371864	-1.22858	0.75624	-1.44393	-0.158055	-1.24716	0.802593	-1.82444	-0.464382	-1.61021	1.14865	-1.01886	2.1914	1.01138	2.46521	2.26705	1.57862	-0.676376	1.66965	0.440379	0.513818	0.00592094	0.608286	-0.271325	-1.75161	0.292277	1.83421	-0.314567	-0.28522	-1.1455	-1.25729	-0.655035	-0.681506	0.019036
Habitat quality variables
Canopy cover (%)	74.316	79.7724	74.5476	71.8855	78.5376	74.2545	78.4044	76.3102	78.2371	71.8693	75.365	75.9895	77.6844	75.1032	81.9293	78.243	82.9032	81.525	77.3959	74.1954	80.0024	75.2041	78.4903	76.6252	79.3192	79.5769	78.6899	78.1816	79.7577	79.0295	78.4896	75.3448	74.933	74.8051	76.0193	76.4237
Mean number of vines	0	1	3.4	0.7	0	4.9	2.4	5.8	9	1.3	0.5	0.7	5	3	6.1	3.1	6.7	9.8	6.9	4.5	2.8	3.4	1	2.4	7.5	1.9	1.7	3.8	9.9	4	8.3	1.2	4.8	9.1	1.5	2.5
Mean tree height (m)	7.25625	7.85389	6.11375	6.5625	6.04375	8.71875	9.7275	8.55	8.71875	7.85625	7.96125	8.00625	8.3625	8.2875	8.08125	7.25625	8.1375	7.48125	7.575	8.625	6.5625	6.43125	8.56875	7.35	9.01875	7.51875	9.7125	8.025	6.65625	8.4	8.35875	7.63125	7.8375	7.9125	10.5938	8.38875
Basal area (m²)	0.0228224	0.0873348	0.0579215	0.0350324	0.0330886	0.0325282	0.183947	0.0960722	0.16712	0.0396998	0.0617336	0.112326	0.0612381	0.0532574	0.0566771	0.0282218	0.103101	0.0311028	0.0284107	0.0946796	0.0250967	0.0542235	0.0681112	0.0446679	0.0570243	0.0277244	0.0508593	0.103861	0.0506058	0.268361	0.055039	0.0271076	0.0462003	0.0746226	0.0533571	0.052641
Understory clutter (%)	42	48	53.6667	64.8333	44	39	57.8333	28.3333	58.1667	61.8333	48.6667	60.1667	70.3333	48.5	71.5	62.5	74.1667	78.8333	76.3333	58.5	57.6667	68.6667	55.1667	52.3333	53.5	41.5	29	60	56.5	42.6667	17.1667	56.8333	42.5	29.1667	68.1667	72.3333
Litter volume (cm³)	0.00350801	0.00258485	0.00264639	0.00249253	0.00492352	0.00224328	0.00267716	0.00189248	0.00223097	0.00175093	0.00150783	0.00295411	0.00369876	0.00243463	0.00299022	0.00376119	0.00264688	0.00119546	0.00335542	0.00265312	0.00441666	0.00319311	0.00440574	0.00340536	0.00218492	0.00205071	0.00119546	0.0023722	0.00257509	0.00185094	0.00283416	0.00159187	0.00155754	0.00269994	0.00282869	0.00245184
Cattle intrusion	0	1	0	2	1	1	0	4	0	0	1	0	0	2.5	0	0	0	0	0	3	2	2	1	1	0	2	4	1	0	3	3	0	2	2	0.5	0
